# Supplementary material
Source: HighWire-hosted journal article supplement (https://srh.bmj.com/highwire/filestream/143425/field_highwire_adjunct_files/1/bmjsrh-2024-202330supp002_data_supplement.pdf)
Supplement: bmjsrh-2024-202330supp002_data_supplement.pdf [file bmjsrh-2024-202330supp002_data_supplement.pdf]

Supplementary Table 1: Frequency of categories of discussion post by participant profession

| Category                     | Number of posts |       |            |
|------------------------------|-----------------|-------|------------|
|                              | GP              | Nurse | Pharmacist |
| Clinical knowledge           | 263             | 20    | 4          |
| Training and upskilling      | 61              | 8     | 0          |
| Health system and regulatory | 70              | 11    | 7          |
| Tools for practice           | 57              | 13    | 4          |
| Ethical issues               | 32              | 12    | 0          |
| Service implementation       | 49              | 24    | 1          |
